# Supplementary material
Source: PubMed Central journal article supplement (PMC3790298)

**Supplementary Figure 1.** Metabolic label incorporation. SILAC peak pairs for a double charged tryptic peptide from vimentin in a 1:1 mix of light and heavy samples. The mass difference between the light and heavy peptide is 6 Da.

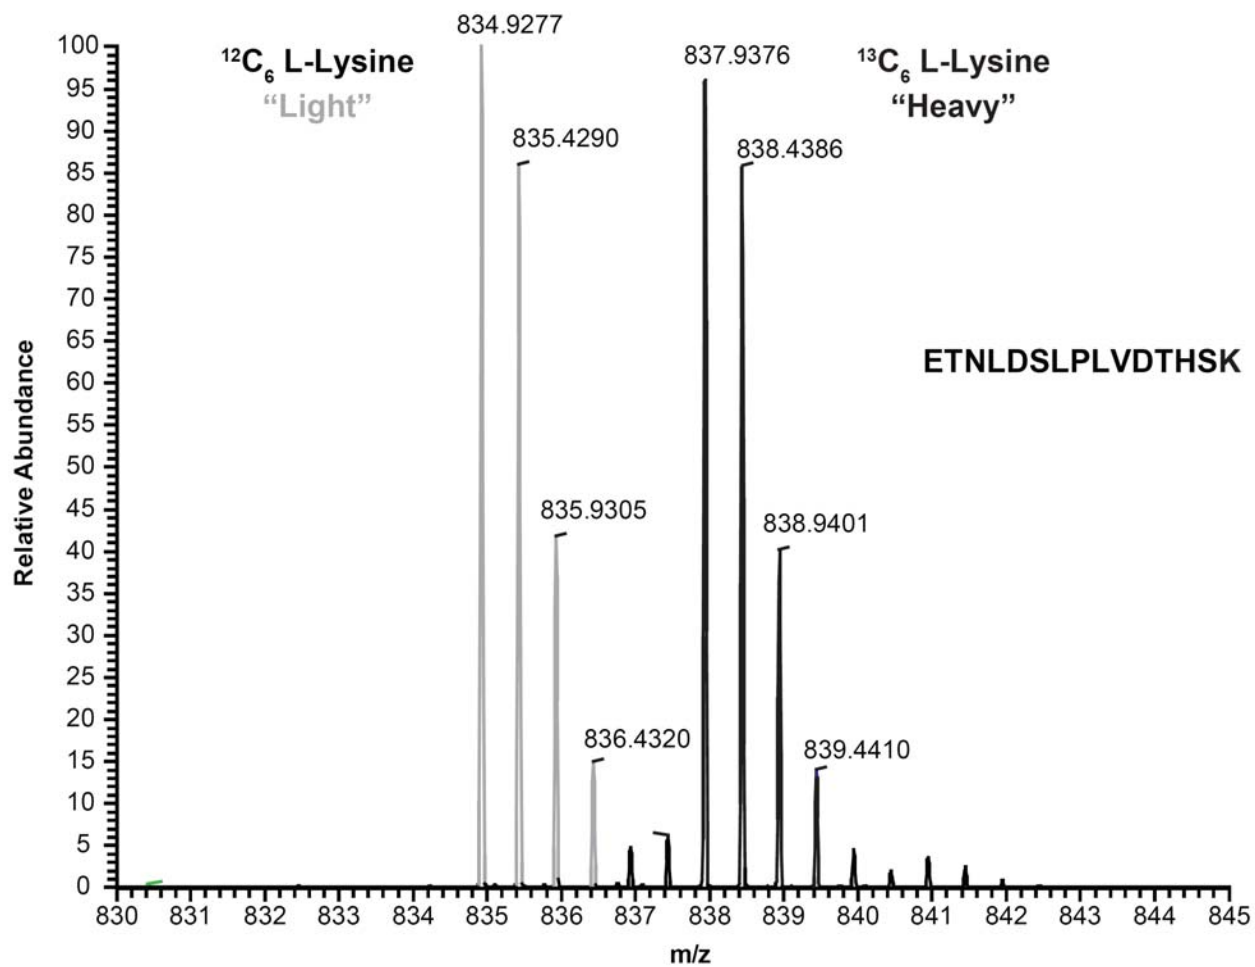

Supplement: supp_M112.024927_mcp.M112.024927-1.pdf [file supp_M112.024927_mcp.M112.024927-1.pdf]
