# Supplementary material
Source: PubMed Central journal article supplement (PMC3790298)

Scan number 5233 Raw file 708\_RodrigoAlves\_16  
 Method ITMS; CID Pepti... 242.48

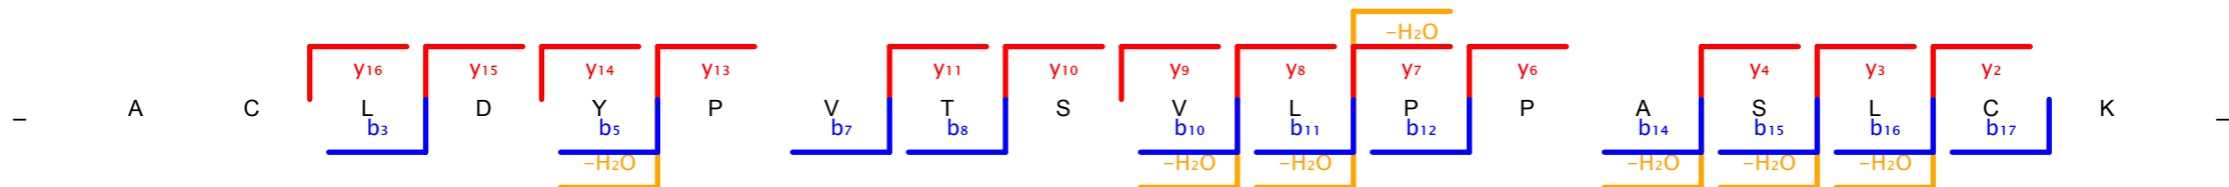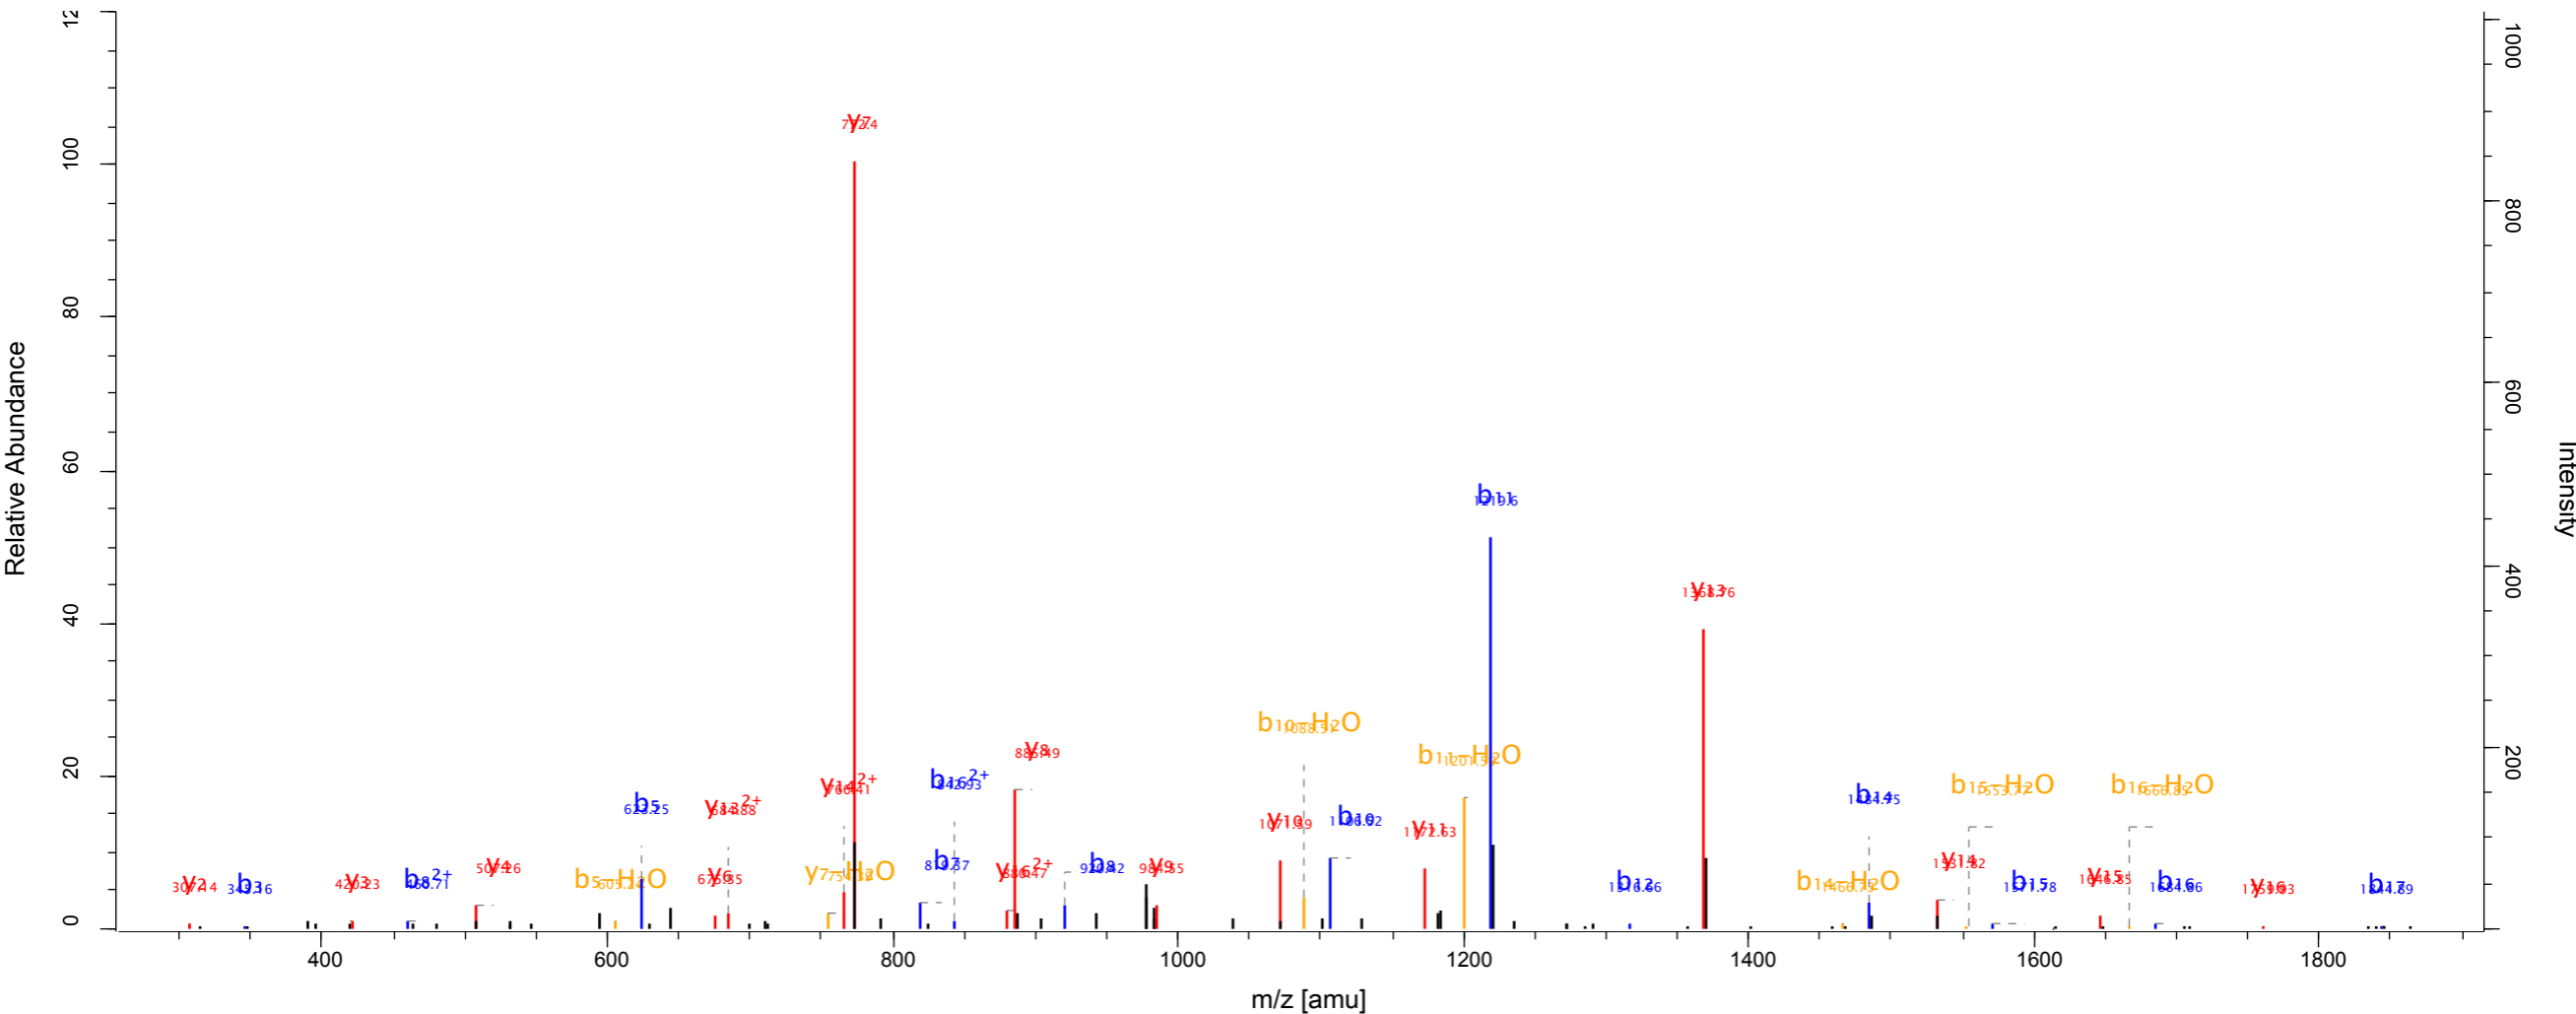

|             |           |          |                     |
|-------------|-----------|----------|---------------------|
| Scan number | 2600      | Raw file | 708_RodrigoAlves_04 |
| Method      | ITMS; CID | Pepti... | 109.07              |

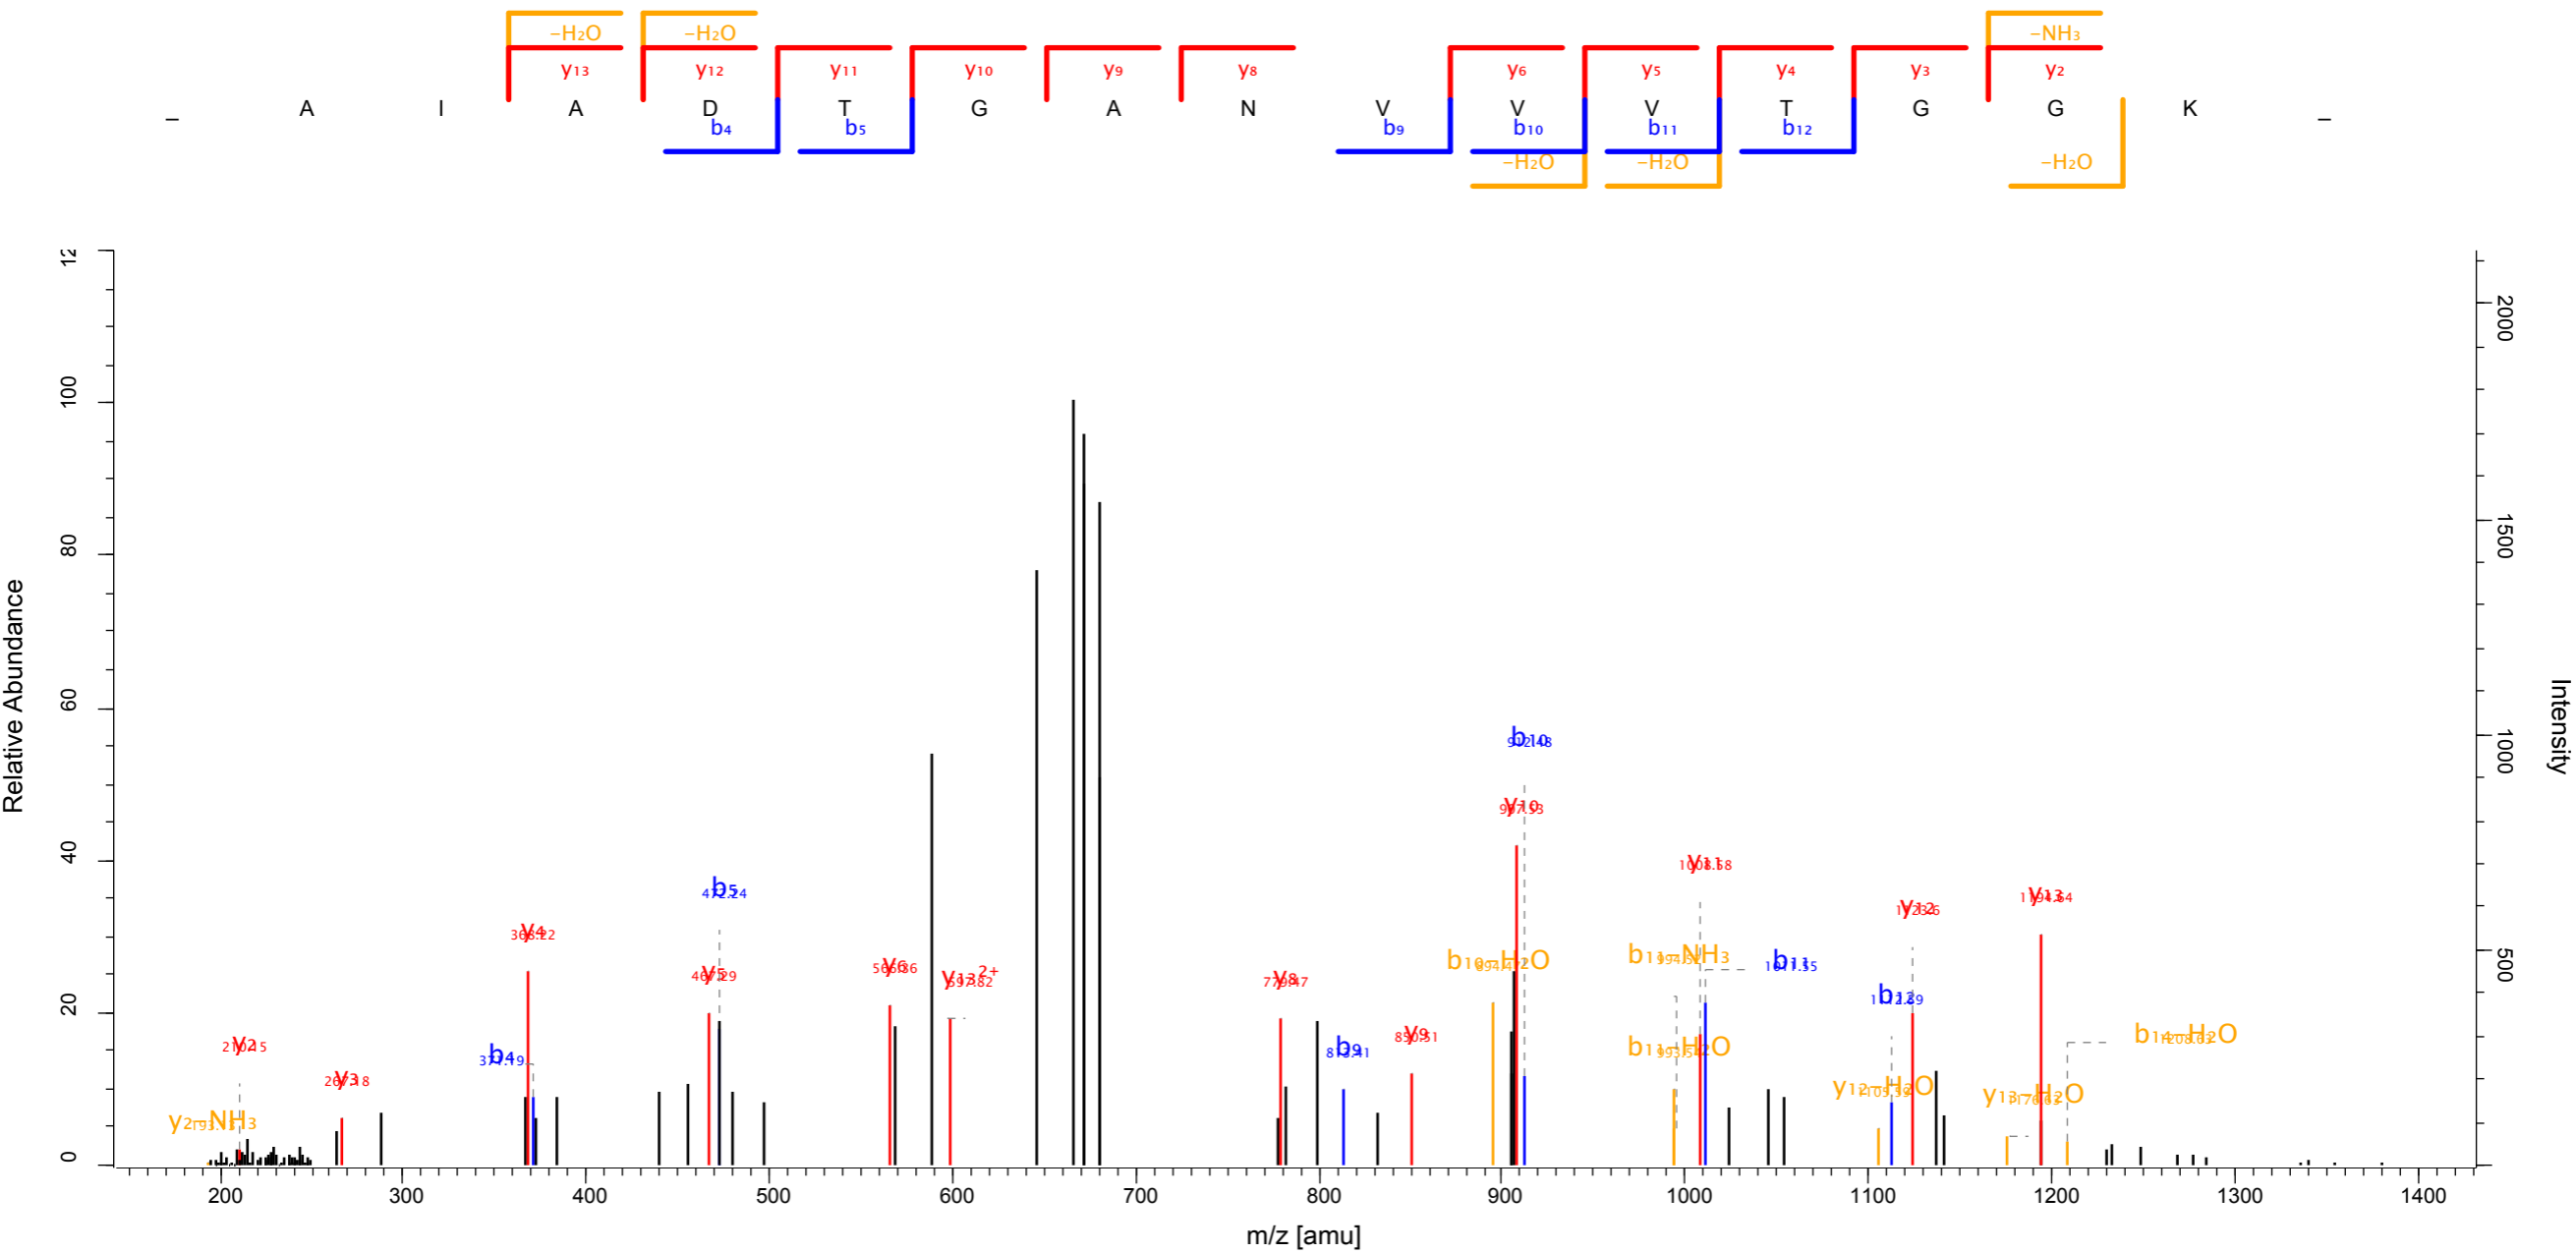

Scan number 3239 Raw file 708\_RodrigoAlves\_16  
 Method ITMS; CID Genenames CAV1

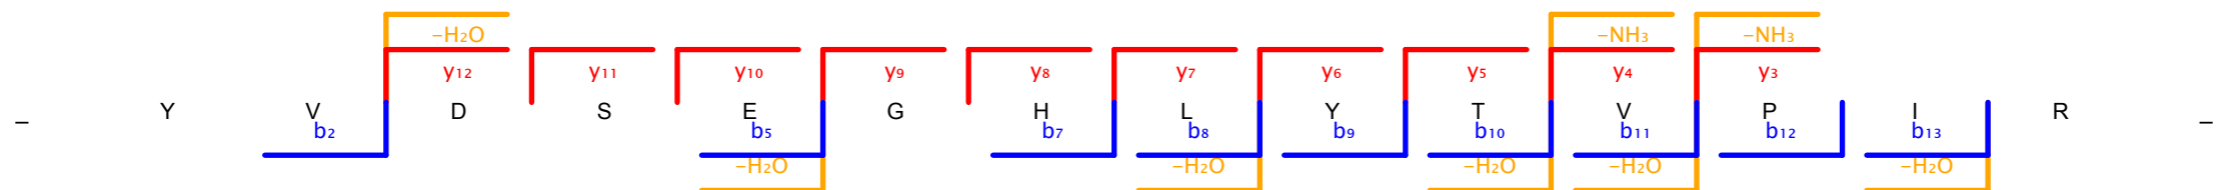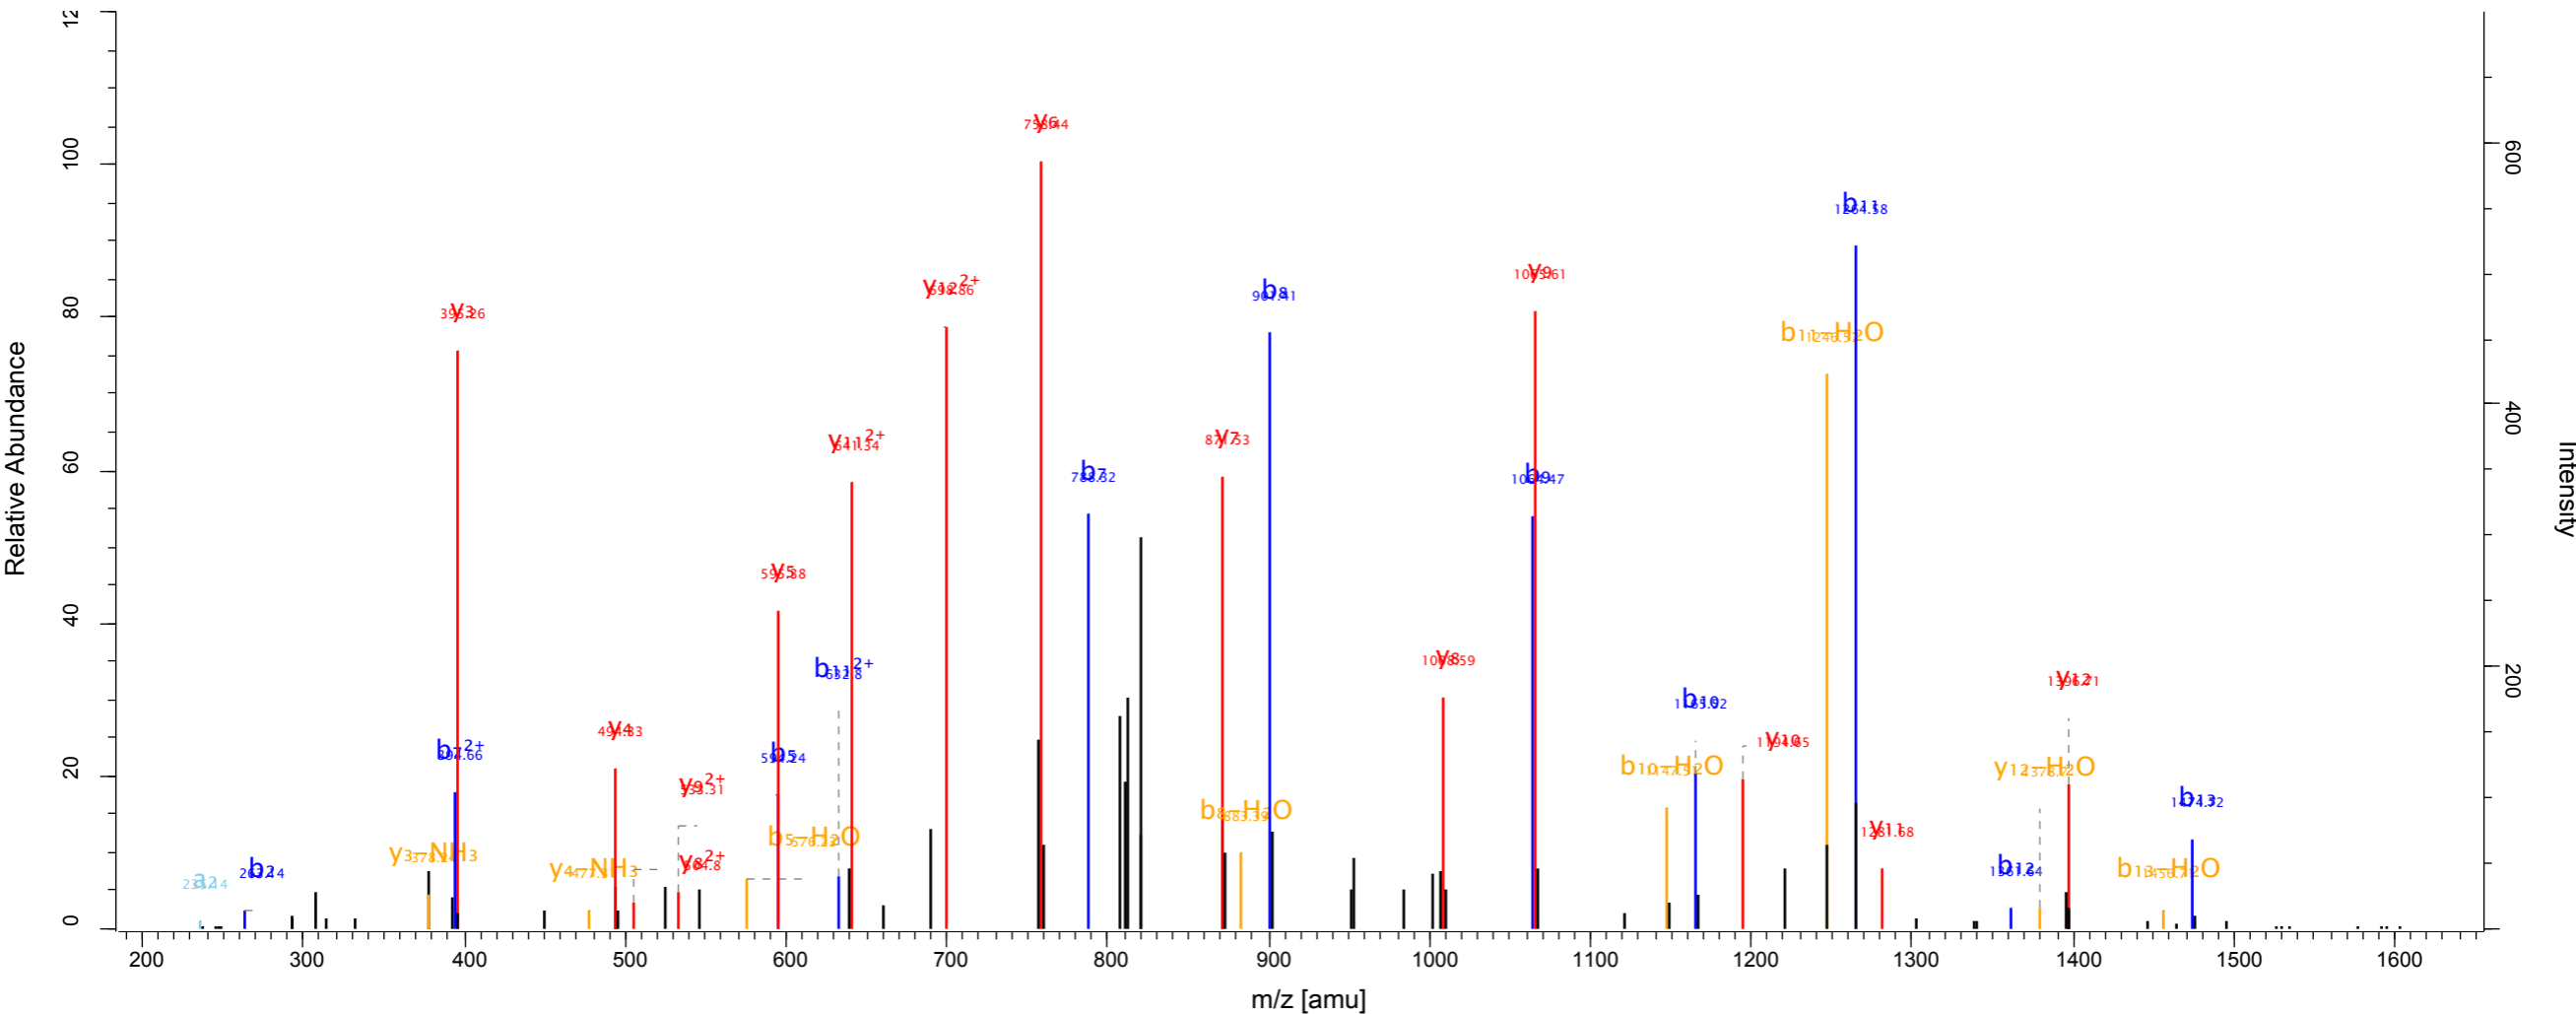

Supplement: supp_M112.024927_mcp.M112.024927-2.pdf [file supp_M112.024927_mcp.M112.024927-2.pdf]
